1 **Title:** Excessive assimilation of ammonium by plastidic glutamine synthetase is a major  
2 cause of ammonium toxicity in *Arabidopsis thaliana*

3 **Authors and affiliations:** Takushi Hachiya<sup>a,b,c</sup>, Jun Inaba<sup>d</sup>, Mayumi Wakazaki<sup>d</sup>, Mayuko  
4 Sato<sup>d</sup>, Kiminori Toyooka<sup>d</sup>, Atsuko Miyagi<sup>e</sup>, Maki Kawai-Yamada<sup>e</sup>, Takatoshi Kiba<sup>b,d</sup>,  
5 Alain Gojon<sup>f</sup>, and Hitoshi Sakakibara<sup>b,d</sup>

6 <sup>a</sup>Department of Molecular and Functional Genomics, Interdisciplinary Center for Science  
7 Research, Shimane University, Matsue 690-8504, Japan, <sup>b</sup>Department of Biological  
8 Mechanisms and Functions, Graduate School of Bioagricultural Sciences, Nagoya  
9 University, Furo-cho, Chikusa-ku, Nagoya, Aichi 464-8601, Japan, <sup>c</sup>Institute for  
10 Advanced Research, Nagoya University, Furo-cho, Chikusa-ku, Nagoya, Aichi 464-8602,  
11 Japan, <sup>d</sup>RIKEN Center for Sustainable Resource Science, 1-7-22 Suehiro-cho, Tsurumi-  
12 ku, Yokohama, Kanagawa 230-0045, Japan, <sup>e</sup>Graduate School of Science and  
13 Engineering, Saitama University, 255 Shimo-Okubo, Sakura-ku, Saitama-city, Saitama  
14 338-8570, Japan, <sup>f</sup>Biochimie et Physiologie Moléculaire des Plantes,  
15 CNRS/INRA/SupAgro-M/Montpellier University, Montpellier 34060, France.

16 **Corresponding Author:** Takushi Hachiya (<http://orcid.org/0000-0002-9239-6529>)  
17 Department of Molecular and Functional Genomics, Center for Interdisciplinary Center  
18 for Science Research, Shimane University, Matsue 690-8504, Japan  
19 E-mail; [takushi.hachiya@life.shimane-u.ac.jp](mailto:takushi.hachiya@life.shimane-u.ac.jp), Tel; +81-852-32-6288

20 **Keywords:** Acidic stress, Ammonium toxicity, Glutamine synthetase

21

22

23 **Abstract**

24 Plants use nitrate and ammonium in the soil as their main nitrogen sources. Recently,  
25 ammonium has attracted attention due to evidence suggesting that, in C<sub>3</sub> species, an  
26 elevated CO<sub>2</sub> environment inhibits nitrate assimilation. However, high concentrations of  
27 ammonium as the sole nitrogen source for plants causes impaired growth, i.e. ammonium  
28 toxicity. Although ammonium toxicity has been studied for a long time, the primary cause  
29 remains to be elucidated. Here, we show that ammonium assimilation in plastids rather  
30 than ammonium accumulation is a primary cause for toxicity. Our genetic screen of  
31 ammonium-tolerant Arabidopsis lines with enhanced shoot growth identified plastidic  
32 *GLUTAMINE SYNTHETASE 2 (GLN2)* as the causal gene. Our reciprocal grafting of  
33 wild-type and *GLN2* or *GLN1;2*-deficient lines suggested that shoot *GLN2* activity results  
34 in ammonium toxicity, whilst root *GLN1;2* activity prevents it. With exposure to toxic  
35 levels of ammonium, the shoot *GLN2* reaction produced an abundance of protons within  
36 cells, thereby elevating shoot acidity and stimulating expression of acidic stress-  
37 responsive genes. Application of an alkaline ammonia solution to the toxic ammonium  
38 medium efficiently alleviated the ammonium toxicity with a concomitant reduction in  
39 shoot acidity. Consequently, we conclude that a primary cause of ammonium toxicity is  
40 acidic stress in the shoot. This fundamental insight provides a framework for enhanced  
41 understanding of ammonium toxicity in plants.

42

43

44

## 45 **Introduction**

46 Nitrate and ammonium are the main sources of nitrogen (N) for most plants.  
47 Recent studies suggest that elevated CO<sub>2</sub> inhibits nitrate reduction in C<sub>3</sub> species, such as  
48 wheat and *Arabidopsis*, whereas ammonium utilization does not decrease (1). One  
49 estimate predicts that only a 1% drop in nitrogen use efficiency could increase worldwide  
50 cultivation costs for crops by about \$1 billion annually (2). Therefore, increasing  
51 ammonium use by crops is an important goal for agriculture as CO<sub>2</sub> levels rise in the  
52 world; however, millimolar concentrations of ammonium as the sole N source causes  
53 growth suppression and chlorosis in plants, compared with nitrate (3, 4, 5). This  
54 phenomenon is widely known as ammonium toxicity, but the primary cause of impaired  
55 growth remains to be identified.

56 Plants grown in high ammonium conditions show several distinct  
57 characteristics from those grown in nitrate (3, 4, 5). These toxic symptoms have evoked  
58 several hypotheses about the toxic causes, including futile transmembrane ammonium  
59 cycling, deficiencies in inorganic cations and organic acids, impaired hormonal  
60 homeostasis, disordered pH regulation, and the uncoupling of photophosphorylation;  
61 however, some of the symptoms are not directly associated with growth suppression by  
62 ammonium toxicity (6), making it difficult to determine the toxic cause. Several efforts  
63 have isolated ammonium-sensitive mutants in *Arabidopsis thaliana* and determined their  
64 causative genes (4, 5). *GMP1* is a causal gene whose deficiency causes stunted growth of  
65 primary roots under high ammonium conditions (7). Given that GMP1 is crucial for  
66 synthesizing GDP-mannose as a substrate for *N*-glycosylation, lack of *N*-glycoproteins

67 could be involved in ammonium hypersensitivity. In accordance with this hypothesis, the  
68 ammonium-dependent inhibition of primary root growth was shown to be partly  
69 attenuated by the lack of a GDP-mannose pyrophosphohydrolase that hydrolyses GDP-  
70 mannose to mannose 1-phosphate and GMP (8). In another study, a genetic screen  
71 focusing on severely chlorotic Arabidopsis leaves identified *AMOS1*, a gene encoding a  
72 plastid metalloprotease, as a factor for improving ammonium tolerance (9).  
73 Transcriptome analysis revealed that an *AMOS1*-dependent mechanism regulates more  
74 than half of the transcriptional changes triggered by toxic levels of ammonium. On the  
75 other hand, recent studies found that ammonium toxicity was partly alleviated by  
76 deficiencies in *EIN2* and *EIN3*, regulators of ethylene responses, or by the application of  
77 ethylene biosynthesis and action inhibitors (10, 11). This suggests that ammonium  
78 toxicity would be mediated via the ethylene signaling pathway.

79         The above-described genetic studies have succeeded in determining molecular  
80 components closely associated with ammonium toxicity. Nevertheless, the initial event  
81 that triggers ammonium toxicity remains to be identified and characterized. To address  
82 this question, we screened ammonium-insensitive Arabidopsis lines that were expected  
83 to attenuate toxicity and isolated *ami2*. Interestingly, the defect in *ami2* was  
84 downregulation of the *GLUTAMINE SYNTHETASE 2 (GLN2)* gene encoding an  
85 ammonium assimilatory enzyme. We identified that in the presence of toxic levels of  
86 ammonium, large levels of proton production, due to excessive primary assimilation of  
87 ammonium by *GLN2*, aggravate the acidic burden and lead to plant toxicity.

88

## 89 **Results**

90 **A Genetic Screen Isolated an Ammonium-Insensitive Mutant.** To find ammonium-  
91 insensitive lines, a gain-of-function population of the Arabidopsis FOX (full-length  
92 cDNA overexpressing) lines (12) was used. An apparent ammonium-insensitive mutant  
93 was identified that shows enhanced growth of cotyledons that are greener than wild-type  
94 (Col) when grown on 10 mM ammonium as the sole N source; the mutant was named  
95 *ammonium-insensitive 2 (ami2)* (Fig. 1A). The fresh weights of *ami2* 11-d-old shoots  
96 were approximately double those of Col when grown on ammonium (Fig. 1B). In contrast,  
97 in media containing 10 mM nitrate or 5 mM ammonium plus 5 mM nitrate, the shoot  
98 fresh weights of *ami2* were less than those of Col. In media containing 10 mM ammonium,  
99 the percentage increase in fresh weight of *ami2* relative to Col was much larger for shoots  
100 (by ca. 110%) than for roots (by ca. 50%) (Fig. 1C). The greater shoot growth in *ami2*  
101 was reduced in media with lower concentrations of ammonium (0.4, 2 mM), in which the  
102 shoot growth of Col was greater than that when grown on media containing 10 mM  
103 ammonium (Fig. 1D). Moreover, nitrate addition in the presence of 10 mM ammonium  
104 attenuated the deficiency in shoot growth more effectively in Col than in *ami2*, decreasing  
105 the growth difference in a concentration-dependent manner (*SI Appendix*, Fig. S1 A and  
106 B). A time-course analysis of shoot growth revealed that increased ammonium tolerance  
107 of the *ami2* plants compared to Col was significant as soon as 5 d after culture initiation  
108 (*SI Appendix*, Fig. S1C). These results indicate that ammonium tolerance in *ami2* is  
109 manifested specifically under harsh ammonium conditions.

110 To corroborate this enhanced ammonium tolerance in *ami2*, we performed  
111 microarray experiments and compared the expression of genes responsive to toxic levels  
112 of ammonium (9) between the Col and *ami2* shoots growing in media containing 10 mM  
113 ammonium (Fig. 1E and *Datasets*, Table S1). The transcript levels of ammonium-  
114 inducible genes were significantly reduced in *ami2* shoots compared with Col shoots,  
115 whereas those of ammonium-repressive genes showed the opposite trend. A reverse  
116 transcription-quantitative PCR (RT-qPCR) analysis confirmed that expression of *MIOX2*  
117 and *PDH2*, two representative ammonium-inducible genes, was more upregulated in the  
118 presence of ammonium than in nitrate-containing media in Col, but not in *ami2* (*SI*  
119 *Appendix*, Fig. S2A). The expression of a house-keeping gene *TIP41* was less changed  
120 (*SI Appendix*, Fig. S2B). Collectively, these results indicate that ammonium toxicity is  
121 attenuated in *ami2* shoots.

122

### 123 ***GLUTAMINE SYNTHETASE 2* is a Major Causative Gene for Ammonium Toxicity.**

124 Next, to identify the causative gene in *ami2*, we recovered the transgene in a vector using  
125 specific primers and sequenced the construct. The gene was identified as *GLUTAMINE*  
126 *SYNTHETASE 2* (*GLN2*), the sole plastidic isoform in *A. thaliana* (Fig. 2A and *SI*  
127 *Appendix*, Fig. S2C). Because the transgene was driven by the cauliflower mosaic virus  
128 35S promoter, we expected that overexpression of *GLN2* would enhance ammonium  
129 tolerance; however, in media containing 10 mM ammonium, the transcript levels of *GLN2*  
130 in *ami2* shoots were downregulated to about 5% of those in Col (Fig. 2B). In contrast,  
131 among the major cytosolic *GLUTAMINE SYNTHETASE* genes (*GLN1s*), *GLN1;1* was

132 upregulated in *ami2* shoots, but *GLN1;2* and *GLN1;3* were slightly downregulated (*SI*  
133 *Appendix*, Fig. S2D). Also, an immunoblot analysis using anti-GLN antibodies (13)  
134 confirmed that the protein levels of GLN2 were remarkably lower in *ami2* shoots  
135 compared with Col, whereas the signal intensities corresponding to GLN1s were  
136 comparable between the mutant and wild type (Fig. 2C). These findings suggested that  
137 overexpression of *GLN2* cDNA would result in a co-suppression event (14), which would  
138 make it difficult to test for phenotypic complementation by introducing the *GLN2*  
139 transgene. To ensure that reduced expression of *GLN2* enhances ammonium tolerance,  
140 we obtained another *GLN2*-deficient line having a T-DNA insertion at the 3'-UTR region  
141 of *GLN2* (SALK\_051953, designated as *gln2*, *SI Appendix*, Fig. S2C). As expected, *gln2*  
142 phenocopied *ami2* in terms of the reduced *GLN2* and GLN2 expression (Fig. 2 B and C),  
143 the enhanced ammonium tolerance (Fig. 2 D and E), and the lowered induction of  
144 ammonium-inducible genes when grown on ammonium (*SI Appendix*, Fig. S2A). Thus,  
145 we concluded that *GLN2* is a causative gene for ammonium toxicity.

146

147 **Shoot GLN2 Causes Ammonium Toxicity; Root GLN1;2 Attenuates Ammonium**  
148 **Toxicity.** Previous studies had reported that mutants deficient in *AtGLN1;2* were  
149 hypersensitive to millimolar concentrations of ammonium (15-17). We also confirmed  
150 the ammonium hypersensitivity of *gln1;2-1* and *gln1;2-2* (*SI Appendix*, Fig. S3 A and B).  
151 *GLN2* and *GLN1;2*, therefore, have opposite effects on ammonium toxicity. To discover  
152 how GLN2 and GLN1;2 are involved in the toxicity, we evaluated the distribution of  
153 *GLN2* and *GLN1;2* expression between shoots and roots in Col plants. In the presence of

154 ammonium or nitrate, the steady-state levels of *GLN2* expression were consistently higher  
155 in the shoots than in the roots, whereas expression of *GLN1;2* was much higher in the  
156 roots (Fig. 3 *A* and *B* and *SI Appendix*, Fig. S4 *A* and *B*), implying that both shoot *GLN2*  
157 and root *GLN1;2* could affect ammonium toxicity. To support this hypothesis, we  
158 performed a growth analysis using reciprocally-grafted plants between Col and *ami2* (Fig.  
159 3*C* and *SI Appendix*, Fig. S4*C*) and between Col and *gln1;2-1* (Fig. 3*D* and *SI Appendix*,  
160 Fig. S4*D*). Prior to the analysis, we confirmed that shoot expression of *GLN2* was lower  
161 in the *ami2*-derived shoots irrespective of root-genotype (*SI Appendix*, Fig. S5), because  
162 *GLN2* mRNA is suggested to be root-to-shoot mobile (18). Only when the scion was  
163 derived from *ami2* was shoot growth significantly enhanced in the presence of 10 mM  
164 ammonium (Fig. 3*C*). On the other hand, deficiency in root *GLN1;2* content was  
165 sufficient to decrease shoot growth in ammonium (Fig. 3*D*). Further, we observed that in  
166 ammonium-grown plants, the total enzymatic activities of GLNs were significantly  
167 reduced by ca. 30-40% in 5-d-old shoots of *ami2* and *gln2* and by ca. 40-60% in 5-d-old  
168 roots of *gln1;2-1* and *gln1;2-2* compared with Col (*SI Appendix*, Fig. S6 *A* and *B*).  
169 Additionally, partially compensatory inductions of other *GLNs* were found in the mutants  
170 (*SI Appendix*, Fig. S6 *C* and *D*). Our findings demonstrate that although shoot *GLN2*  
171 causes ammonium toxicity in the shoot, root *GLN1;2* attenuates ammonium toxicity.

172

### 173 **Decreased *GLN2* Activity Reduces the Conversion of Ammonium to Amino Acids**

174 **in Shoots.** It is generally held that ammonium *per se* is a toxic compound (19). On the  
175 other hand, a deficiency in *GLN2* content should lead to ammonium accumulation in the



176 shoot. Our determination of shoot ammonium content revealed that *ami2* and *gln2* shoots  
177 grown on 10 mM ammonium both accumulated more than 100  $\mu\text{mol g}^{-1}$  fresh weight of  
178 ammonium (Fig. 4A), albeit the two mutants accumulated more fresh weight than Col (*SI*  
179 *Appendix*, Fig. S7). This result indicates that ammonium assimilation by GLN2, rather  
180 than ammonium accumulation, triggers ammonium toxicity in the shoot.

181           An ample supply of ammonium increases the concentrations of amino acids  
182 compared with nitrate supply alone (6, 20). In particular, the molar ratios of Gln to Glu  
183 are elevated at higher ammonium levels, suggesting that Gln synthesis by glutamine  
184 synthetase (GLN) overflows glutamate synthase (GOGAT) capacity. Our hierarchical  
185 cluster analysis of amino acid content in shoots clearly demonstrated that the type of N  
186 source, i.e. 10 mM ammonium or nitrate, was the strongest determinant for plant amino  
187 acid composition (Fig. 4B and *SI Appendix*, S8A). In this analysis, Col and the *GLN2*-  
188 deficient lines categorized into separate clusters depending on the N source. The molar  
189 ratio of Gln to Glu (Fig. 4C), total amino acid-N content per amino acid (*SI Appendix*,  
190 Fig. S8B), total amino acid-N content per fresh weight (*SI Appendix*, Fig. S8C), and the  
191 molar ratios of N to C in total amino acids (*SI Appendix*, Fig. S8D) were consistently  
192 larger in ammonium-grown shoots than nitrate-grown shoots, and this large ammonium-  
193 N input was partly but significantly attenuated by *GLN2* deficiency. These findings  
194 suggest that the *GLN2* reaction leads to excessive incorporation of ammonium-N into  
195 amino acids in shoots when toxic levels of ammonium are present.

196

197 **Ammonium Assimilation by GLN2 Causes Acidic Stress.** The amino acid profiles  
198 suggested that metabolic imbalances due to excessive ammonium assimilation by GLN2  
199 could be a cause of ammonium toxicity. We have previously demonstrated that nitrate  
200 addition at adequate concentrations mitigates ammonium toxicity without reducing amino  
201 acid accumulation (6). Therefore, a phenomenon triggered by some GLN2-mediated  
202 process other than amino acid accumulation should be a cause of ammonium toxicity.  
203 Notably, the GLN reaction is a proton-producing process (21). The stoichiometry of this  
204 reaction is two protons per each glutamine produced, one proton of which is derived from  
205 ATP hydrolysis and the other is from deprotonation of  $\text{NH}_4^+$ . Conversely, the subsequent  
206 ferredoxin-dependent glutamate synthase (Fd-GOGAT) reaction consumes two protons  
207 per one glutamine incorporated. Given that the molar ratio of Gln to Glu was about 10 in  
208 the ammonium condition but close to 1 in the nitrate condition (Fig. 4C), proton  
209 production in the ammonium condition could proceed beyond its consumption. Strikingly,  
210 a previous study found that 43% of ammonium-inducible genes correspond to acidic  
211 stress-inducible genes in *Arabidopsis* roots (22, 23). Thus, we hypothesized that  
212 excessive ammonium assimilation by GLN2 causes acidic stress to the plants growing in  
213 ammonium.

214 We re-surveyed our microarray data by focusing on previously identified acidic  
215 stress-responsive genes (23) (Fig. 5A and *Datasets*, Table S2). All acidic stress-inducible  
216 genes were entirely downregulated in *ami2* shoots compared with Col, whereas the acidic  
217 stress-repressive genes showed the opposite trend. The transcript levels of *ALMT1*, a  
218 typical acidic stress-inducible gene, were determined in the shoots of Col and *ami2* plants

219 incubated in 10 mM ammonium or nitrate with or without methionine sulfoximine (MSX),  
220 an inhibitor of the GLN reaction (Fig. 5B). *ALMT1* expression was much higher in the  
221 ammonium-treated Col shoots than the nitrate-treated samples. This ammonium-  
222 dependent induction was significantly diminished in the *ami2* shoots and was mimicked  
223 by MSX treatment. Also, other proton-inducible genes such as *GABA-T*, *GAD1*, *GDH2*,  
224 *PGIP1*, and *PGIP2* (24) were ammonium-inducible, and their inductions were suppressed  
225 or attenuated by *GLN2* deficiency (*SI Appendix*, Fig. S9A). These results support our  
226 hypothesis associating ammonium assimilation with acidic stress. Moreover, in Col and  
227 *ami2* reciprocally-grafted plants growing in the ammonium condition, *ALMT1* expression  
228 was significantly lower in the *ami2*-derived shoots than the Col-derived shoots (*SI*  
229 *Appendix*, Fig. S9B), indicating that shoot *GLN2* locally causes acidic stress to the shoot.  
230 Furthermore, *ALMT1* expression was analyzed using grafted plants between Col and a  
231 mutant lacking the STOP1 transcription factor (*stop1-KO*) that induces *ALMT1* to  
232 respond to acidic stress (24) (*SI Appendix*, Fig. S9C). In the *stop1-KO*-derived shoots, the  
233 ammonium-dependent induction of *ALMT1* disappeared, reconfirming the notion that  
234 acidic stress occurs in plants growing in ammonium.

235           It is widely accepted that the reduction from nitrate to ammonium consumes a  
236 proton, suggesting that nitrate reduction could attenuate acidic stress caused by excess  
237 ammonium and might explain why nitrate addition alleviates ammonium toxicity. To  
238 verify this hypothesis, we analyzed shoot expression of *ALMT1* using grafted plants  
239 between Col and the *NITRATE REDUCTASE*-null mutant (designated as NR-null) (25)  
240 (*SI Appendix*, Fig. S9D). Addition of 2.5 mM nitrate diminished the ammonium-

241 dependent *ALMT1* induction in the Col-derived shoots but not in the NR-null-derived  
242 shoots, thereby supporting the above hypothesis.

243 To obtain direct evidence for ammonium-dependent proton production, we  
244 measured the proton concentrations of water extracts from the Col and *ami2* shoots  
245 incubated in media containing 10 mM ammonium or nitrate with or without MSX (Fig.  
246 5C). The ammonium-treated Col shoots contained the highest concentrations of protons;  
247 proton content was significantly decreased by *GLN2* deficiency and by MSX treatment  
248 to levels comparable to those in nitrate-treated shoots. A similar trend was observed  
249 among the Col, *ami2*, and *gln2* shoots grown on ammonium- or nitrate-containing media  
250 (*SI Appendix*, Fig. S9E).

251 The presence of ammonium in cultures generally acidifies the external media  
252 (22). Thus, we quantified the proton efflux from the Col and *ami2* shoots incubated in  
253 media containing 10 mM ammonium or nitrate with or without MSX (Fig. 5D).  
254 Incubation of the Col shoots in the presence of ammonium strongly acidified the external  
255 media, which was alleviated by *GLN2* deficiency and by MSX treatment. A similar  
256 tendency was observed by qualitative measurements with a pH indicator of proton  
257 effluxes from mesophyll cells where *GLN2* is predominantly expressed (*SI Appendix*, Fig.  
258 S9F). Thus, we conclude that ammonium assimilation by *GLN2* without nitrate increases  
259 shoot acidity.

260

261 **Ammonium Toxicity is Closely Associated with Acidic Stress.** If acidic stress rather  
262 than ammonium accumulation has a dominant effect on ammonium toxicity, an

263 application of alkaline ammonia should reduce the toxicity. Given that the GLN2 reaction  
264 is a primary cause of increased acidic stress, an elevation in medium pH may increase the  
265 shoot growth of Col more effectively than that of the *GLN2*-deficient mutants. As  
266 expected, addition of a 25% ammonia solution to media containing 10 mM ammonium  
267 elevated the pH from 5.7 to 6.7 and significantly improved shoot growth with a  
268 concomitant decrease in acidity (Fig. 6A). Fresh weights of Col shoots grown at pH 6.7  
269 increased by ca. 180% compared with those grown at pH 5.7, whereas fresh weights of  
270 *ami2* and *gln2* shoots only increased by ca. 30% and 60%, respectively (Fig. 6B). In  
271 addition, the acid-sensitive *STOPI*-deficient mutants had slightly but significantly lower  
272 shoot growth when grown in 10 mM ammonium (Fig. 6C and *SI Appendix*, Fig. S9G),  
273 although their acid-hypersensitivity has been described only in roots to date (24, 26).  
274 Moreover, the NR-null-derived shoots that lack a proton-consuming nitrate reduction  
275 capacity failed to attenuate ammonium toxicity by nitrate addition (Fig. 6D). Collectively,  
276 our results lead to the conclusion that acidic stress is one of the primary causes of  
277 ammonium toxicity.

278

279 **GLN2 Causes Ammonium Toxicity Independently of NRT1.1.** We have already  
280 reported that Arabidopsis NITRATE TRANSPORTER 1.1 (NRT1.1), acting as a nitrate  
281 transceptor, also aggravates ammonium toxicity (27). This result was recently confirmed  
282 by another group (11). Thus, we investigated whether NRT1.1 and GLN2 increase the  
283 sensitivity to ammonium through a common mechanism. A RT-qPCR analysis revealed  
284 that deficiency of either *NRT1.1* or *GLN2* did not downregulate the expression of the

285 other gene (*SI Appendix*, Fig. S10A), and that *GLN2* expression was almost 3-times higher  
286 in *nrt1.1* than in Col. Therefore, the enhanced ammonium tolerance of *nrt1.1* cannot be  
287 explained by reduced *GLN2* expression as in *gln2*. Moreover, a homozygous double  
288 mutant of *NRT1.1* and *GLN2* showed slightly but significantly larger shoot fresh weight,  
289 leaf number, shoot diameter, and chlorophyll content compared with any of the single  
290 mutants (*SI Appendix*, Fig. S10 B-D). These findings suggest that *NRT1.1* and *GLN2* are  
291 implicated in ammonium-sensitivity independently.

292

293

294

295

296

297

298

299

300

301

302

303

304

305

306

## 307 **Discussion**

308 Although ammonium is a toxic compound for plant growth, our results demonstrate that  
309 ammonium assimilation by shoot GLN2 rather than ammonium accumulation is a major  
310 cause of ammonium toxicity (Fig. 2 and Fig. 4). In plants growing in toxic levels of  
311 ammonium as a sole N source, assimilation of ammonium by GLN2 would occur largely  
312 due to bypassing nitrate reduction as the rate-limiting step for N assimilation. The  
313 resultant increase in the ratio of Gln to Glu content (Fig. 4C) corresponds to the  
314 preferential enhancement of the proton-producing GLN reaction over the proton-  
315 consuming GOGAT reaction. This metabolic imbalance exerted by the GLN2 reaction  
316 leads to the production of large amounts of protons in shoot cells that stimulate proton  
317 effluxes to the apoplast; however, the volume of the shoot apoplast is probably too  
318 small to accommodate such a large proton efflux. Thus, in the presence of toxic levels of  
319 ammonium, the GLN2 reaction causes acidic stress inside and outside the cells and  
320 triggers acidic stress responses that modulate gene expression (Fig. 5 and *SI Appendix*,  
321 Fig. S9 A-F). Given that the wild-type when grown at a higher pH phenocopies the  
322 ammonium-insensitive lines at lower pH, the acidic stress-sensitive mutants show  
323 ammonium-hypersensitivity, and proton-consuming nitrate reduction alleviates  
324 ammonium toxicity (Fig. 6 and *SI Appendix*, Fig. S9G), we conclude that acidic stress is  
325 one of the primary causes for ammonium toxicity. In this framework, upregulation of  
326 Arabidopsis *NIA1* and *NIA2* genes encoding nitrate reductase (NR) (23, 24) and activation  
327 of spinach NR (28) responding to acidic stress are understandable regulatory responses  
328 in the context of maintaining cellular pH homeostasis.

329           The present study does not address how ammonium-dependent acidification  
330 triggers growth deficiency at the cellular and subcellular scales. The chloroplastic  
331 localization of GLN2 indicates that proton production must occur within chloroplasts in  
332 the elevated ammonium condition. A previous study reported abnormal chloroplast  
333 membrane structure including swollen compartments at late stages of ammonium toxicity  
334 (29); however, we did not find any similar structural changes in the shoots of ammonium-  
335 grown plants (*SI Appendix*, Fig. S11A), where the intermediates of the Calvin-Benson  
336 cycle were not depleted compared with nitrate-grown shoots (*SI Appendix*, Fig. S11B).  
337 These observations do not support a deficiency in chloroplast function as a primary cause  
338 of ammonium toxicity. Apoplastic pH in sunflower leaves and cytosolic pH in carrot cell  
339 suspensions decrease after application of millimolar levels of ammonium (30, 31). The  
340 ammonium-inducible genes whose expression is downregulated by *GLN2* deficiency,  
341 *PGIP1* and *PGIP2* (*SI Appendix*, Fig. S9A), contribute to cell wall stabilization under  
342 acidic stress (26), implying apoplastic acidification as a target of ammonium toxicity. On  
343 the other hand, in the presence of toxic levels of ammonium, the GABA shunt-related  
344 genes (*SI Appendix*, Fig. S9A) and oxygen uptake rates (32) are induced as biochemical  
345 pH-stats (33) that may represent an intracellular acidic burden. Given that changes in pH  
346 environments influence a wide spectrum of physiological processes, elucidating the  
347 relationship between ammonium-dependent acidification and growth deficiency awaits  
348 future study.

349           At the whole-plant scale, our grafting work demonstrated that root *GLN1;2*  
350 activity attenuates ammonium toxicity in the shoots, whilst shoot *GLN2* activity causes



351 the condition (Fig. 3). Considering that GLN1;2 is the ammonium-inducible low-affinity  
352 enzyme expressed in the epidermis and cortex of roots, and its deficiency elevates  
353 ammonium levels in xylem sap when ammonium is supplied (17), root GLN1;2 could act  
354 as a barrier to prevent the shoot-to-root transport of ammonium, thus avoiding ammonium  
355 assimilation by shoot GLN2. In oilseed rape plants, replacing 3 mM nitrate in a nutrient  
356 solution with 10 mM ammonium increased the ammonium levels in xylem sap linearly  
357 with time, attaining concentrations greater than 5 mM (34), which could indicate breaking  
358 through the barrier. On the other hand, we did not determine whether shoot GLN1  
359 isozymes attenuate or deteriorate the toxicity. With ammonium nitrate nutrition,  
360 Arabidopsis shoot GLN1;2 activity promotes shoot growth (35). We observed a larger  
361 protein signal corresponding to shoot GLN1s when plants received ammonium rather  
362 than nitrate nutrition (*SI Appendix*, Fig. S12 A and B), implying a barrier function of  
363 GLN1 in the shoot. Further grafting work using several combinations of multiple mutants  
364 on *GLN1s* are required to confirm this hypothesis.

365           The present study demonstrated that *GLN2* and *NRT1.1* reduce ammonium  
366 tolerance via separate mechanisms when plants experience high ammonium conditions  
367 (*SI Appendix*, Fig. S10). On the other hand, these genes are nitrate-inducible genes that  
368 are crucial for plant adaptation to nitrate-dominant environments (36, 37). This  
369 observation suggests that the adaptive traits to nitrate and ammonium could be exclusive,  
370 and therefore, breeding elevated CO<sub>2</sub>-adapted crops in terms of their mode of N utilization,  
371 i.e. ammonium-tolerant crops, might sacrifice their adaptability to nitrate.

372

373 **Materials and Methods**

374 Detailed information on plant materials, their growth conditions, isolation of ammonium-  
375 insensitive lines, expression analyses for mRNAs and proteins, the grafting procedure,  
376 the activity assay, metabolite analysis by mass spectrometry, physiological analyses,  
377 TEM observations, and statistical analyses is provided in *SI Appendix, SI Materials and*  
378 *Methods*.

379

380

381

382

383

384

385

386

387

388

389

390

391

392

393

394

395 **ACKNOWLEDGMENTS.** Seeds of the *A thaliana* NR-null mutant were kindly  
396 provided by Prof. Nigel M. Crawford, Division of Biological Sciences, University of  
397 California, San Diego. This work was supported by the Building of Consortia for the  
398 Development of Human Resources in Science and Technology, by the Japan Society for  
399 the Promotion of Science KAKENHI Grant No. JP17K15237, by the Inamori Foundation,  
400 by the Agropolis Foundation No. 1502-405, and by a Grant-in-Aid for Young Scientists  
401 from Shimane University.

402

403

404

405

406

407

408

409

410

411

412

413

414

415

416

417 **References**

- 418 1. Rubio-Asensio JS, Bloom AJ (2016) Inorganic nitrogen form: a major player in wheat  
419 and Arabidopsis responses to elevated CO<sub>2</sub>. *J Exp Bot* 68: 2611-2625.
- 420 2. Kant S, Bi YM, Rothstein SJ (2011) Understanding plant response to nitrogen  
421 limitation for the improvement of crop nitrogen use efficiency. *J Exp Bot* 62: 1499-  
422 1509.
- 423 3. Britto DT, Kronzucker HJ (2002) NH<sub>4</sub><sup>+</sup> toxicity in higher plants: a critical review. *J*  
424 *Plant Physiol* 159: 567-584.
- 425 4. Li B, Li G, Kronzucker HJ, Baluška F, Shi W (2014) Ammonium stress in  
426 *Arabidopsis* signaling, genetic loci, and physiological targets. *Trends Plant Sci* 19:  
427 107-114.
- 428 5. Esteban R, Ariz I, Cruz C, Moran JF (2016) Mechanisms of ammonium toxicity and  
429 the quest for tolerance. *Plant Sci* 248: 92-101.
- 430 6. Hachiya, T et al. (2012) Nitrate addition alleviates ammonium toxicity without  
431 lessening ammonium accumulation, organic acid depletion and inorganic cation  
432 depletion in *Arabidopsis thaliana* shoots. *Plant Cell Physiol* 53: 577-591.
- 433 7. Qin C, et al. (2008) GDP-mannose pyrophosphorylase is a genetic determinant of  
434 ammonium sensitivity in *Arabidopsis thaliana*. *Proc Natl Acad Sci USA* 105: 18308-  
435 18313.
- 436 8. Tanaka H, et al. (2015) Identification and characterization of *Arabidopsis* AtNUDX9 as  
437 a GDP-d-mannose pyrophosphohydrolase: its involvement in root growth inhibition  
438 in response to ammonium. *J Exp Bot* 66: 5797-5808.

- 439 9. Li B, et al. (2012) Arabidopsis plastid metalloprotease AMOS1/EGY1 integrates with  
440 ABA signaling to regulate global gene expression in response to ammonium stress.  
441 *Plant Physiol* 160: 2040-2051.
- 442 10. Li G, et al. (2019) The Arabidopsis *AMOT1/EIN3* gene plays an important role in the  
443 amelioration of ammonium toxicity. *J Exp Bot* 70: 1375-1388
- 444 11. Jian S, et al. (2018) NRT1.1-related  $\text{NH}_4^+$  toxicity is associated with a disturbed  
445 balance between  $\text{NH}_4^+$  uptake and assimilation. *Plant Physiol* 178: 1473-1488.
- 446 12. Ichikawa T, et al. (2006) The FOX hunting system: an alternative gain-of-function  
447 gene hunting technique. *Plant J* 48 : 974-985.
- 448 13. Sakakibara H, Kawabata S, Hase T, Sugiyama T (1992) Differential effects of nitrate  
449 and light on the expression of glutamine synthetases and ferredoxin-dependent  
450 glutamate synthase in maize. *Plant Cell Physiol* 33: 1193-1198.
- 451 14. Cheng XF, Wang ZY (2005) Overexpression of *COL9*, a *CONSTANS-LIKE* gene,  
452 delays flowering by reducing expression of *CO* and *FT* in *Arabidopsis thaliana*. *Plant*  
453 *J* 43: 758-768.
- 454 15. Lothier J, et al. (2011) The cytosolic glutamine synthetase GLN1;2 plays a role in the  
455 control of plant growth and ammonium homeostasis in *Arabidopsis* rosettes when  
456 nitrate supply is not limiting. *J Exp Bot* 62: 1375-1390.
- 457 16. Guan M, Møller IS, Schjoerring JK (2015) Two cytosolic glutamine synthetase  
458 isoforms play specific roles for seed germination and seed yield structure in  
459 *Arabidopsis*. *J Exp Bot* 66: 203-212.

- 460 17. Konishi N, et al. (2017) Contributions of two cytosolic glutamine synthetase isozymes  
461 to ammonium assimilation in *Arabidopsis* roots. *J Exp Bot* 68: 613-625.
- 462 18. Thieme CJ, et al. (2015) Endogenous *Arabidopsis* messenger RNAs transported to  
463 distant tissues. *Nat Plants* 1: 15025.
- 464 19. Bittsánszky A, Pilinszky K, Gyulai G, Komives T (2015) Overcoming ammonium  
465 toxicity. *Plant Sci* 231: 184-190.
- 466 20. Sato S, Soga T, Nishioka T, Tomita M (2004) Simultaneous determination of the main  
467 metabolites in rice leaves using capillary electrophoresis mass spectrometry and  
468 capillary electrophoresis diode array detection. *Plant J* 40: 151-163.
- 469 21. Britto DT, Kronzucker HJ (2005) Nitrogen acquisition, PEP carboxylase, and cellular  
470 pH homeostasis: new views on old paradigms. *Plant Cell Environ* 28: 1396-1409.
- 471 22. Patterson K, et al. (2010) Distinct signalling pathways and transcriptome response  
472 signatures differentiate ammonium- and nitrate-supplied plants. *Plant Cell Environ*  
473 33: 1486-1501.
- 474 23. Lager I, et al. (2010) Changes in external pH rapidly alter plant gene expression and  
475 modulate auxin and elicitor responses. *Plant Cell Environ* 33: 1513-1528.
- 476 24. Sawaki Y, et al. (2009) STOP1 regulates multiple genes that protect *Arabidopsis* from  
477 proton and aluminum toxicities. *Plant Physiol* 150: 281-294.
- 478 25. Wang R, Xing X, Crawford N (2007) Nitrite acts as a transcriptome signal at  
479 micromolar concentrations in *Arabidopsis* roots. *Plant Physiol* 145: 1735-1745.
- 480 26. Kobayashi Y, et al. (2014) STOP2 activates transcription of several genes for Al- and  
481 Low pH-tolerance that are regulated by STOP1 in *Arabidopsis*. *Mol Plant* 7: 311-322.

- 482 27. Hachiya T, et al. (2011) Evidence for a nitrate-independent function of the nitrate  
483 sensor NRT1.1 in *Arabidopsis thaliana*. *J Plant Res* 124: 425-430.
- 484 28. Kaiser WM, Brendle-Behnisch E (1995) Acid-base-modulation of nitrate reductase  
485 in leaf tissues. *Planta* 196: 1-6.
- 486 29. Puritch GS, Barker AV (1967) Structure and function of tomato leaf chloroplasts  
487 during ammonium toxicity. *Plant Physiol* 42: 1229-1238.
- 488 30. Carroll AD, et al. (1994) Ammonium assimilation and the role of  $\gamma$ -aminobutyric acid  
489 in pH homeostasis in carrot cell suspensions. *Plant Physiol* 106: 513-520.
- 490 31. Hoffmann B, Plänker R, Mengel K (1992) Measurement of pH in the apoplast of  
491 sunflower leaves by means of fluorescence. *Physiol Plant* 84: 146–153.
- 492 32. Hachiya T, et al. (2010) Ammonium-dependent respiratory increase is dependent on  
493 the cytochrome pathway in *Arabidopsis thaliana* shoots. *Plant Cell Environ* 33: 1888-  
494 1897.
- 495 33. Sakano K (1998) Revision of Biochemical pH-Stat: Involvement of Alternative  
496 Pathway Metabolisms. *Plant Cell Physiol* 39: 467-473.
- 497 34. Schjoerring JK, Husted S, Mäck G, Mattsson M (2002) The regulation of ammonium  
498 translocation in plants. *J Exp Bot* 53: 883-890.
- 499 35. Guan M, Schjoerring JK (2016) Peering into the separate roles of root and shoot  
500 cytosolic glutamine synthetase 1;2 by use of grafting experiments in *Arabidopsis*.  
501 *Plant Signal Behav* 11: e1245253.
- 502 36. Hachiya T, Sakakibara H (2017) Interactions between nitrate and ammonium in their  
503 uptake, allocation, assimilation, and signaling in plants. *J Exp Bot* 68: 2501-2512.

504 37. Marchive C, et al. (2013) Nuclear retention of the transcription factor NLP7

505 orchestrates the early response to nitrate in plants. *Nat Commun* 4: 1713.

506

507

508

509

510

511

512

513

514

515

516

517

518

519

520

521

522

523

524

525



526 **Figure Legends**

527 **Fig. 1** Enhanced shoot growth of *ami2* in the presence of 10 mM ammonium. (A) A  
528 representative photograph of shoots from the wild-type (Col) and *ami2* grown on media  
529 containing 10 mM ammonium for 11 d. The scale bar represents 5 mm. (B) Fresh weights  
530 (FW) of shoots from Col and *ami2* grown on media containing 10 mM ammonium (mean  
531  $\pm$  SD; n = 10), 5 mM ammonium nitrate (mean  $\pm$  SD; n = 5), or 10 mM nitrate (mean  $\pm$   
532 SD; n = 5) for 11 d. (C) FW of shoots and roots from Col and *ami2* grown on media  
533 containing 10 mM ammonium for 11 d (mean  $\pm$  SD; n = 26). (D) FW of shoots grown on  
534 media containing 0.4, 2, or 10 mM ammonium for 11 d (mean  $\pm$  SD, n = 5). (E) Box plots  
535 of the differences in the expression of the ammonium stress-responsive genes between  
536 the Col and *ami2* shoots 3 d after transfer to media containing 10 mM ammonium. The  
537 gene list was obtained from (9) (For further details, see *Datasets*, Table S1). Two  
538 independent experiments (Exp1 and Exp2) were performed. Nine shoots from three plates  
539 constituted a single biological replicate. An individual box plot shows the median (heavy  
540 vertical line), the 25<sup>th</sup> to 75<sup>th</sup> percentiles (right and left sides of the box), the 10<sup>th</sup> to 90<sup>th</sup>  
541 percentiles (whiskers), and the mean (closed circle). (B-D) Six shoots from one plate  
542 constituted a single biological replicate. (B, E) Welch's *t*-test was run at  $\alpha = 0.05$ ; \**p* <  
543 0.05. (C, D) Tukey-Kramer's multiple comparison test was conducted at a significance  
544 level of *P* < 0.05 only when a one-way ANOVA was significant at *P* < 0.05. Different  
545 letters denote significant differences.

546

547 **Fig. 2** Downregulation of *GLN2* enhances ammonium tolerance. (A) Genomic PCR using  
548 *GLN2*-specific primers. g and c denote the PCR fragments derived from genomic DNA  
549 and cDNA sequences corresponding to *GLN2*, respectively. (B) Relative transcript levels  
550 of *GLN2* in the shoots of Col, *ami2*, and *gln2* 3 d after transfer to media containing 10  
551 mM ammonium or 10 mM nitrate (mean  $\pm$  SD; n = 3). Six shoots from two plates  
552 constituted a single biological replicate. (C) Immunodetection of GLN1s and GLN2  
553 isoproteins using specific antisera raised against maize GLN following SDS-PAGE and  
554 immunoblotting of total proteins from the shoots of Col, *ami2*, and *gln2* 5 d after transfer  
555 to media containing 10 mM ammonium or 10 mM nitrate. LSU denotes large subunits of  
556 RuBisCO. (D) A representative photograph of shoots from Col, *ami2*, and *gln2* 7 d after  
557 transfer to media containing 10 mM ammonium or 10 mM nitrate. The scale bar  
558 represents 10 mm. (E) FW of shoots from Col, *ami2*, and *gln2* 7 d after transfer to media  
559 containing 10 mM ammonium (mean  $\pm$  SD; n = 8) or 10 mM nitrate (mean  $\pm$  SD; n = 5).  
560 Mean values of three shoots from one plate constituted a single biological replicate. (B,  
561 E) Tukey-Kramer's multiple comparison test was conducted at a significance level of  $P$   
562  $< 0.05$  only when a one-way ANOVA was significant at  $P < 0.05$ . Different letters denote  
563 significant differences.

564

565 **Fig. 3** Shoot GLN2 causes ammonium toxicity, whilst root GLN1;2 attenuates  
566 ammonium toxicity. (A) Relative transcript levels of *GLN2* in the shoots and roots of Col  
567 grown on media containing 10 mM ammonium for 5, 8, or 11 d (mean  $\pm$  SD; n = 3). (B)  
568 Relative transcript levels of *GLN1;2* in the shoots and roots of Col grown on media

569 containing 10 mM ammonium for 5, 8, or 11 d (mean  $\pm$  SD; n = 3). (A, B) Twelve shoots  
570 and roots from one plate constituted a single biological replicate. Welch's *t*-test was run  
571 at  $\alpha = 0.05$ ; \**p* < 0.05. (C) FW of shoots from reciprocally-grafted plants between Col  
572 (C) and *ami2* (*a*) 7 d after transfer to media containing 10 mM ammonium (mean  $\pm$  SD;  
573 n = 8). (D) FW of shoots from reciprocally-grafted plants between Col (C) and *gln1.2-1*  
574 7 d after transfer to media containing 10 mM ammonium (mean  $\pm$  SD; n = 10). (C, D)  
575 One shoot from one plate constituted a single biological replicate. Tukey-Kramer's  
576 multiple comparison test was conducted at a significance level of *P* < 0.05 only when a  
577 one-way ANOVA was significant at *P* < 0.05. Different letters denote significant  
578 differences. Representative photograph of shoots 7 d after transfer to media containing  
579 10 mM ammonium are shown. The scale bar represents 10 mm.

580

581 **Fig. 4** Decreased activity of GLN2 reduces the conversion of ammonium to amino acids  
582 in shoots. (A) The shoot ammonium content of Col, *ami2*, and *gln2* 5 d after transfer to  
583 media containing 10 mM ammonium or 10 mM nitrate (mean  $\pm$  SD; n = 3). Three shoots  
584 from one plate constituted a single biological replicate. (B) Hierarchical clustering of the  
585 shoot amino acid content of Col (C), *ami2* (*a*), and *gln2* (*g*) 5 d after transfer to media  
586 containing 10 mM ammonium or 10 mM nitrate. The color spectrum from yellow to blue  
587 corresponds to the relative content of each amino acid. (C) The molar ratio of Gln to Glu  
588 in the shoots of Col, *ami2*, and *gln2* 5 d after transfer to media containing 10 mM  
589 ammonium or 10 mM nitrate (mean  $\pm$  SE; n = 3). (A, C) Tukey-Kramer's multiple  
590 comparison test was conducted at a significance level of *P* < 0.05 only when a one-way

591 ANOVA was significant at  $P < 0.05$ . Different letters denote significant differences. (B,  
592 C) Six shoots from two plates constituted a single biological replicate. Three biological  
593 replicates were sampled separately three times.

594

595 **Fig. 5** Ammonium assimilation by GLN2 causes acidic stress. (A) Box plots of the  
596 differences in expression of the acidic stress-responsive genes between the Col and *ami2*  
597 shoots 3 d after transfer to media containing 10 mM ammonium. The gene list was  
598 obtained from (23) (For further details, see *Datasets*, Table S2). Two independent  
599 experiments (Exp1 and Exp2) were performed. Nine shoots from three plates constituted  
600 a single biological replicate. An individual box plot shows the median (heavy vertical  
601 line), the 25<sup>th</sup> to 75<sup>th</sup> percentiles (right and left sides of the box), the 10<sup>th</sup> to 90<sup>th</sup> percentiles  
602 (whiskers), and the mean (closed circle). Welch's *t*-test was run at  $\alpha = 0.05$ ; \* $p < 0.05$ .  
603 (B) Effects of MSX treatment on the relative transcript level of *ALMT1* in the Col and  
604 *ami2* shoots 3 d after transfer to media containing 10 mM ammonium or 10 mM nitrate.  
605 The transcript levels were evaluated both by RT-qPCR (mean  $\pm$  SD;  $n = 3$ ) and semi-  
606 quantitative RT-PCR with agarose gel electrophoresis. *ACTIN2* (*ACT2*) was the internal  
607 standard. Three shoots from one plate constituted a single biological replicate. (C) Effects  
608 of MSX treatment on proton concentrations in water extracts from the Col and *ami2*  
609 shoots 3 d after transfer to media containing 10 mM ammonium or 10 mM nitrate (mean  
610  $\pm$  SD;  $n = 3$ ). Three shoots from one plate constituted a single biological replicate. (D)  
611 Effects of MSX treatment on proton efflux rates from the Col and *ami2* shoots 3 d after  
612 transfer to media containing 10 mM ammonium or 10 mM nitrate (mean  $\pm$  SE;  $n = 3$ ).

613 Three shoots from one plate constituted a single biological replicate. (B-D) Tukey-  
614 Kramer's multiple comparison test was conducted at a significance level of  $P < 0.05$  only  
615 when a one-way ANOVA was significant at  $P < 0.05$ . Different letters denote significant  
616 differences.

617

618 **Fig. 6** Ammonium toxicity is closely linked with acidic stress. (A) Effects of  $\text{NH}_3$   
619 application on shoot FW and proton concentrations in water extracts of Col grown on  
620 media containing 10 mM ammonium or 10 mM nitrate for 5 d (mean  $\pm$  SD;  $n = 3$ ). Thirty-  
621 seven shoots from one plate constituted a single biological replicate. The pH was adjusted  
622 to pH 5.7 with 1N KOH; subsequently, 25% (v/v) ammonia was added to adjust the pH  
623 from 5.7 to 6.7. A representative photograph of 11-d-old shoots grown on 10 mM  
624 ammonium (12 plants per plate) is shown. (B) Effects of intermediate pH on the FW of  
625 shoots from Col, *ami2*, and *gln2* grown on media containing 10 mM ammonium for 11 d  
626 (mean  $\pm$  SD;  $n = 6$ ). Three shoots from one plate constituted a single biological replicate.  
627 The pH was adjusted to pH 5.7 with 1N KOH; subsequently, 1N NaOH was used to adjust  
628 the pH from 5.7 to 6.7 to maintain the potassium concentration constant among all  
629 samples. A representative photograph of 11-d-old shoots is shown. (C) FW of shoots from  
630 Col, *stop1-KO* (*stop1-k*), and the *stop1* mutant (*stop1-m*) grown on media containing 10  
631 mM ammonium (mean  $\pm$  SD;  $n = 20$ ) or 10 mM nitrate (mean  $\pm$  SD;  $n = 5$ ) for 11 d. Six  
632 shoots from one plate constituted a single biological replicate. Welch's *t*-test was run at  
633  $\alpha = 0.05$ ; \* $p < 0.05$ . NS denotes not significant. (D) FW of shoots from plants grafted  
634 between Col (C) and the NR-null mutant (*nr*) 7 d after transfer to media containing 10

635 mM ammonium ( $\text{NH}_4^+$ ) or 2.5 mM nitrate and 10 mM ammonium ( $\text{NH}_4^+ \text{NO}_3^-$ )  
636 conditions (mean  $\pm$  SD; n = 3). One shoot from one plate constituted a single biological  
637 replicate. A representative photograph of shoots 7 d after transfer to media is shown. (*A*,  
638 *B*, *D*) Tukey-Kramer's multiple comparison test was conducted at a significance level of  
639  $P < 0.05$  only when a one-way ANOVA was significant at  $P < 0.05$ . Different letters  
640 denote significant differences. The scale bar represents 10 mm.

**Figure 1**

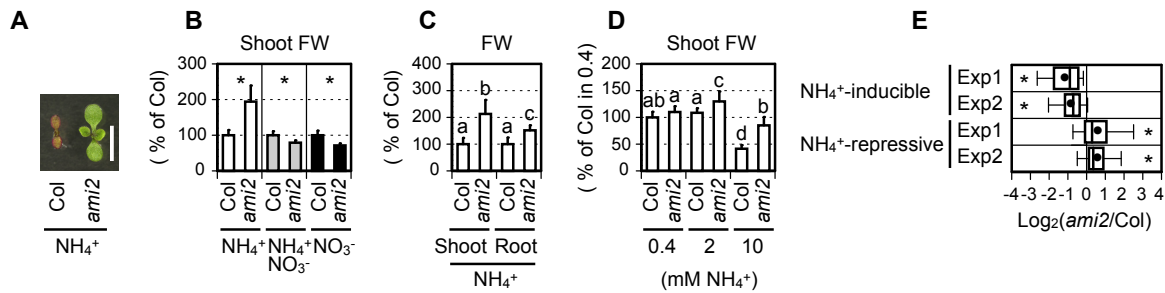

**Fig. 1** Enhanced shoot growth of *ami2* in the presence of 10 mM ammonium. (A) A representative photograph of shoots from the wild-type (Col) and *ami2* grown on media containing 10 mM ammonium for 11 d. The scale bar represents 5 mm. (B) Fresh weights (FW) of shoots from Col and *ami2* grown on media containing 10 mM ammonium (mean  $\pm$  SD; n = 10), 5 mM ammonium nitrate (mean  $\pm$  SD; n = 5), or 10 mM nitrate (mean  $\pm$  SD; n = 5) for 11 d. (C) FW of shoots and roots from Col and *ami2* grown on media containing 10 mM ammonium for 11 d (mean  $\pm$  SD; n = 26). (D) FW of shoots grown on media containing 0.4, 2, or 10 mM ammonium for 11 d (mean  $\pm$  SD; n = 5). (E) Box plots of the differences in the expression of the ammonium stress-responsive genes between the Col and *ami2* shoots 3 d after transfer to media containing 10 mM ammonium. The gene list was obtained from (9) (For further details, see *Datasets*, Table S1). Two independent experiments (Exp1 and Exp2) were performed. Nine shoots from three plates constituted a single biological replicate. An individual box plot shows the median (heavy vertical line), the 25<sup>th</sup> to 75<sup>th</sup> percentiles (right and left sides of the box), the 10<sup>th</sup> to 90<sup>th</sup> percentiles (whiskers), and the mean (closed circle). (B-D) Six shoots from one plate constituted a single biological replicate. (B, E) Welch's *t*-test was run at  $\alpha = 0.05$ ; \* $p < 0.05$ . (C, D) Tukey-Kramer's multiple comparison test was conducted at a significance level of  $P < 0.05$  only when a one-way ANOVA was significant at  $P < 0.05$ . Different letters denote significant differences.

**Figure 2**

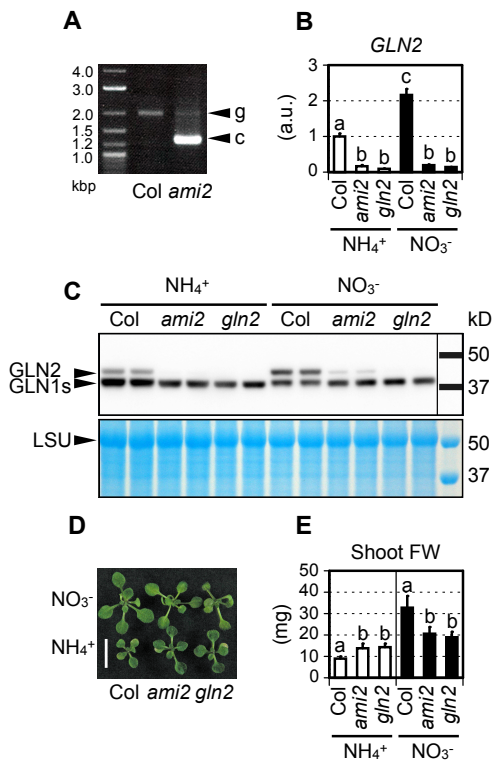

**Fig. 2** Downregulation of *GLN2* enhances ammonium tolerance. (A) Genomic PCR using *GLN2*-specific primers. g and c denote the PCR fragments derived from genomic DNA and cDNA sequences corresponding to *GLN2*, respectively. (B) Relative transcript levels of *GLN2* in the shoots of Col, *ami2*, and *gln2* 3 d after transfer to media containing 10 mM ammonium or 10 mM nitrate (mean  $\pm$  SD; n = 3). Six shoots from two plates constituted a single biological replicate. (C) Immunodetection of GLN1s and *GLN2* isoproteins using specific antisera raised against maize GLN following SDS-PAGE and immunoblotting of total proteins from the shoots of Col, *ami2*, and *gln2* 5 d after transfer to media containing 10 mM ammonium or 10 mM nitrate. LSU denotes large subunits of RuBisCO. (D) A representative photograph of shoots from Col, *ami2*, and *gln2* 7 d after transfer to media containing 10 mM ammonium or 10 mM nitrate. The scale bar represents 10 mm. (E) FW of shoots from Col, *ami2*, and *gln2* 7 d after transfer to media containing 10 mM ammonium (mean  $\pm$  SD; n = 8) or 10 mM nitrate (mean  $\pm$  SD; n = 5). Mean values of three shoots from one plate constituted a single biological replicate. (B, E) Tukey-Kramer's multiple comparison test was conducted at a significance level of  $P < 0.05$  only when a one-way ANOVA was significant at  $P < 0.05$ . Different letters denote significant differences.



**Figure 3**

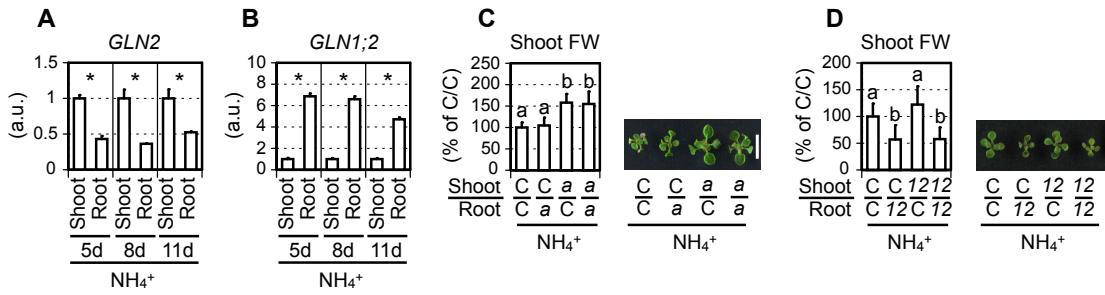

**Fig. 3** Shoot *GLN2* causes ammonium toxicity, whilst root *GLN1;2* attenuates ammonium toxicity. (A) Relative transcript levels of *GLN2* in the shoots and roots of Col grown on media containing 10 mM ammonium for 5, 8, or 11 d (mean  $\pm$  SD; n = 3). (B) Relative transcript levels of *GLN1;2* in the shoots and roots of Col grown on media containing 10 mM ammonium for 5, 8, or 11 d (mean  $\pm$  SD; n = 3). (A, B) Twelve shoots and roots from one plate constituted a single biological replicate. Welch's *t*-test was run at  $\alpha = 0.05$ ; \* $p < 0.05$ . (C) FW of shoots from reciprocally-grafted plants between Col (C) and *ami2* (a) 7 d after transfer to media containing 10 mM ammonium (mean  $\pm$  SD; n = 8). (D) FW of shoots from reciprocally-grafted plants between Col (C) and *gln1.2-1* 7 d after transfer to media containing 10 mM ammonium (mean  $\pm$  SD; n = 10). (C, D) One shoot from one plate constituted a single biological replicate. Tukey-Kramer's multiple comparison test was conducted at a significance level of  $P < 0.05$  only when a one-way ANOVA was significant at  $P < 0.05$ . Different letters denote significant differences. Representative photograph of shoots 7 d after transfer to media containing 10 mM ammonium are shown. The scale bar represents 10 mm.

**Figure 4**

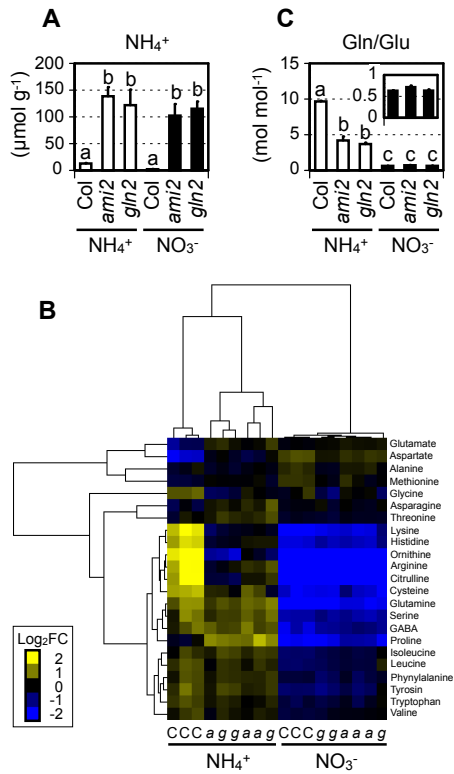

**Fig. 4** Decreased activity of GLN2 reduces the conversion of ammonium to amino acids in shoots. **(A)** The shoot ammonium content of Col, *ami2*, and *gln2* 5 d after transfer to media containing 10 mM ammonium or 10 mM nitrate (mean ± SD; n = 3). Three shoots from one plate constituted a single biological replicate. **(B)** Hierarchical clustering of the shoot amino acid content of Col (C), *ami2* (a), and *gln2* (g) 5 d after transfer to media containing 10 mM ammonium or 10 mM nitrate. The color spectrum from yellow to blue corresponds to the relative content of each amino acid. **(C)** The molar ratio of Gln to Glu in the shoots of Col, *ami2*, and *gln2* 5 d after transfer to media containing 10 mM ammonium or 10 mM nitrate (mean ± SE; n = 3). **(A, C)** Tukey-Kramer's multiple comparison test was conducted at a significance level of  $P < 0.05$  only when a one-way ANOVA was significant at  $P < 0.05$ . Different letters denote significant differences. **(B, C)** Six shoots from two plates constituted a single biological replicate. Three biological replicates were sampled separately three times.

**Figure 5**

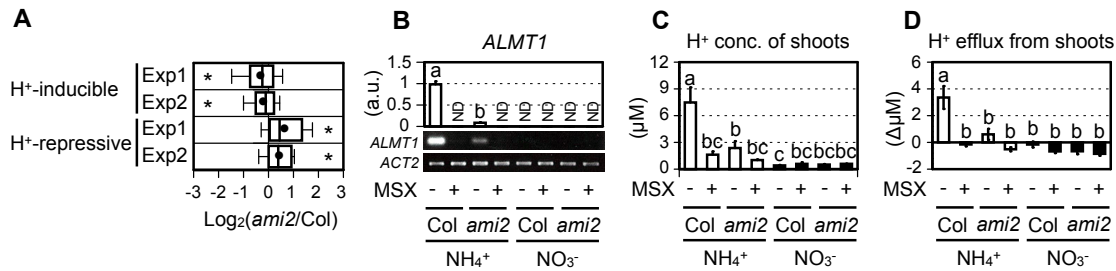

**Fig. 5** Ammonium assimilation by GLN2 causes acidic stress. (A) Box plots of the differences in expression of the acidic stress-responsive genes between the Col and *ami2* shoots 3 d after transfer to media containing 10 mM ammonium. The gene list was obtained from (21) (For further details, see *Datasets*, Table S2). Two independent experiments (Exp1 and Exp2) were performed. Nine shoots from three plates constituted a single biological replicate. An individual box plot shows the median (heavy vertical line), the 25<sup>th</sup> to 75<sup>th</sup> percentiles (right and left sides of the box), the 10<sup>th</sup> to 90<sup>th</sup> percentiles (whiskers), and the mean (closed circle). Welch's *t*-test was run at  $\alpha = 0.05$ ; \* $p < 0.05$ . (B) Effects of MSX treatment on the relative transcript level of *ALMT1* in the Col and *ami2* shoots 3 d after transfer to media containing 10 mM ammonium or 10 mM nitrate. The transcript levels were evaluated both by RT-qPCR (mean  $\pm$  SD;  $n = 3$ ) and semi-quantitative RT-PCR with agarose gel electrophoresis. *ACTIN2* (*ACT2*) was the internal standard. Three shoots from one plate constituted a single biological replicate. (C) Effects of MSX treatment on proton concentrations in water extracts from the Col and *ami2* shoots 3 d after transfer to media containing 10 mM ammonium or 10 mM nitrate (mean  $\pm$  SD;  $n = 3$ ). Three shoots from one plate constituted a single biological replicate. (D) Effects of MSX treatment on proton efflux rates from the Col and *ami2* shoots 3 d after transfer to media containing 10 mM ammonium or 10 mM nitrate (mean  $\pm$  SE;  $n = 3$ ). Three shoots from one plate constituted a single biological replicate. (B-D) Tukey-Kramer's multiple comparison test was conducted at a significance level of  $P < 0.05$  only when a one-way ANOVA was significant at  $P < 0.05$ . Different letters denote significant differences.

**Figure 6**

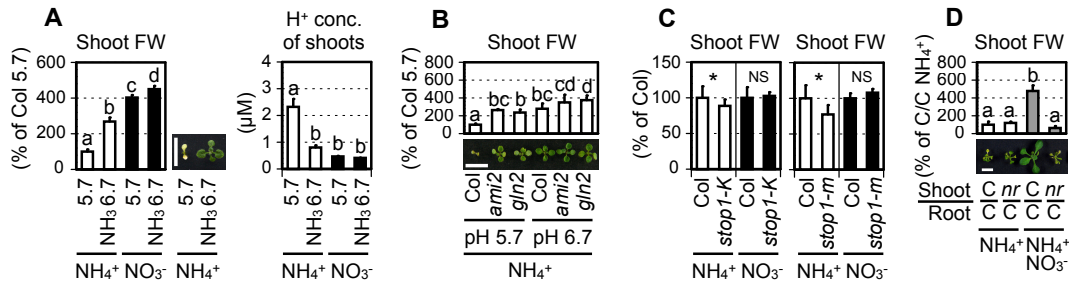

**Fig. 6** Ammonium toxicity is closely linked with acidic stress. (A) Effects of NH<sub>3</sub> application on shoot FW and proton concentrations in water extracts of Col grown on media containing 10 mM ammonium or 10 mM nitrate for 5 d (mean ± SD; n = 3). Thirty-seven shoots from one plate constituted a single biological replicate. The pH was adjusted to pH 5.7 with 1N KOH; subsequently, 25% (v/v) ammonia was added to adjust the pH from 5.7 to 6.7. A representative photograph of 11-d-old shoots grown on 10 mM ammonium (12 plants per plate) is shown. (B) Effects of intermediate pH on the FW of shoots from Col, *ami2*, and *gln2* grown on media containing 10 mM ammonium for 11 d (mean ± SD; n = 6). Three shoots from one plate constituted a single biological replicate. The pH was adjusted to pH 5.7 with 1N KOH; subsequently, 1N NaOH was used to adjust the pH from 5.7 to 6.7 to maintain the potassium concentration constant among all samples. A representative photograph of 11-d-old shoots is shown. (C) FW of shoots from Col, *stop1-KO* (*stop1-k*), and the *stop1* mutant (*stop1-m*) grown on media containing 10 mM ammonium (mean ± SD; n = 20) or 10 mM nitrate (mean ± SD; n = 5) for 11 d. Six shoots from one plate constituted a single biological replicate. Welch's *t*-test was run at  $\alpha = 0.05$ ; \**p* < 0.05. NS denotes not significant. (D) FW of shoots from plants grafted between Col (C) and the NR-null mutant (*nr*) 7 d after transfer to media containing 10 mM ammonium (NH<sub>4</sub><sup>+</sup>) or 2.5 mM nitrate and 10 mM ammonium (NH<sub>4</sub><sup>+</sup> NO<sub>3</sub><sup>-</sup>) conditions (mean ± SD; n = 3). One shoot from one plate constituted a single biological replicate. A representative photograph of shoots 7 d after transfer to media is shown. (A, B, D) Tukey-Kramer's multiple comparison test was conducted at a significance level of *P* < 0.05 only when a one-way ANOVA was significant at *P* < 0.05. Different letters denote significant differences. The scale bar represents 10 mm.
